# Supplementary material for: Expression of NK Cell Surface Receptors in Breast Cancer Tissue as Predictors of Resistance to Antineoplastic Treatment
Source: PubMed Central journal article supplement — Technol Cancer Res Treat. 2018 Mar 20;17:1533033818764499. doi: 10.1177/1533033818764499 (PMC5882046; doi:10.1177/1533033818764499), 2018-03-20
Supplement: 764499_Supplementary_figure.pdf [file 764499_Supplementary_figure.pdf]

### Graphical illustrations of percentage cancer cellularity

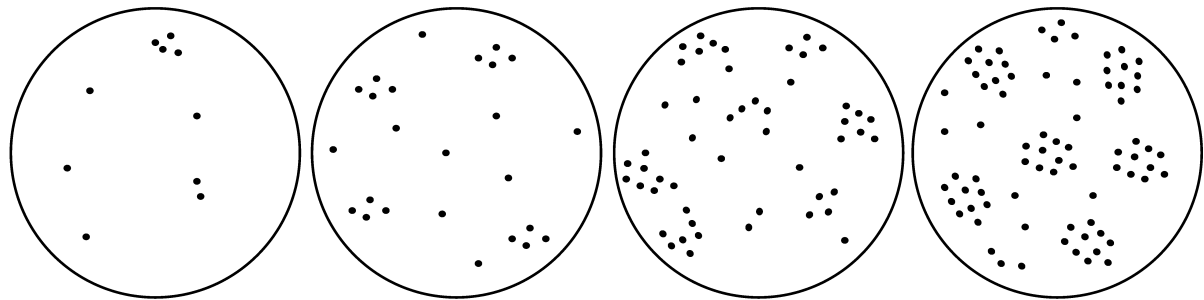

1% Scattered

5% Scattered

10% Scattered

20% Scattered

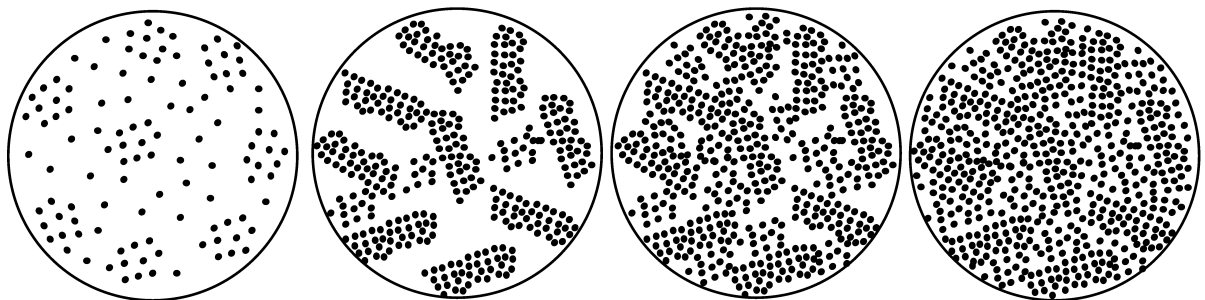

30% Scattered

50% Scattered

70% Scattered

90% Scattered
